# Supplementary material for: What influences the implementation of group antenatal care in English NHS maternity settings? Findings from a qualitative process evaluation integrated within a randomised controlled trial of Pregnancy Circles
Source: Research Square preprint supplement (doi:10.21203/rs.3.rs-6396617/v1), 2025-04-23
Supplement: Supplementary file 1 [file 9a960802b5247c6d2973ca2d.docx]

## Supplementary File 4

Themes summarising the perceived challenges, benefits and opportunities of implementation of Pregnancy Circles within the NHS, listed by CFIR domain.

| **CFIR Domain** | **Perceived Challenges** | **Perceived Benefits/Opportunities** |
| --- | --- | --- |
| **Innovation domain** (describes perceptions of the design, relative advantage, adaptability and cost implications of Pregnancy Circles) | - Requires change at an organisational and personal level.  - Poor continuity of carer was detrimental to fidelity to the model’s core values.  - Concerns about privacy in group setting  - Higher running costs (staffing, training, admin) when not integrated into service  - Short-term trialling limits potential benefits for services | - Radical solution to entrenched problems  - Adaptable to different contexts; easily reversible.  - Established clinical safety of model  - Addresses limitations of traditional antenatal care: less ‘production-line’; more time for health education  - Enables social support  - Potentially cost-saving if embedded in normal care (e.g. higher recruitment; staff retention; cancelling clinics)  - Potential for specialist Pregnancy Circles  - Extending the model postnatally  - Interdisciplinary collaboration |
| **Implementation process domain** (explores the activities and strategies used for the implementation of Pregnancy Circles) | - 9-12 months needed for implementation planning to overcome practical barriers  - Pragmatic choice of teams/locations and bias among some involved in recruitment limited diversity of participants  - Low number of participants in some Circles due to research team challenges.  - Not including childcare  - Suggesting cutting back on the model (shorter/fewer sessions) to save time/ minimise disruption | - Senior managers providing vision & resources  - Training: facilitation skills and addressing unconscious bias  - Protected time for planning, reflection and follow-up  - PC champions and designated ‘Pregnancy Circles Midwife’ to trouble-shoot and support facilitators  - Engaging with service users  - Accessible venues co-located with community services.  - Pregnancy Circles as an ‘opt out’ model of care.  - Opportunities to link with other services/providers (e.g. include health visitor or infant feeding counsellor) |
| **Outer setting domain** (examines macro-level influences beyond the local implementation context) | - Covid-19 pandemic restrictions  - National staff shortages, especially following the pandemic.  - Integrating maternity and other services: challenges to cross-boundary working.  - Group Care not specifically mentioned in national maternity policy.  - Not all can assert maternity rights for time off work for visits  - Need for systems change, including NHS estates. | - Covid highlighted need to enhance community support  - Evidence of clinical safety  - Aligned with national policy on choice, personalisation and continuity.  - Removal of national full Continuity of Carer targets.  - National drivers to promote equity.  - Potential for integration of group care model within future national policy |
| **Inner setting domain** (explores service characteristics that may influence implementation) | - Accessing/paying for venues large enough for group care in community settings due to poor integration of health & social care.  - Poor technological infrastructure  - Culture of efficiency undervaluing advocacy and education; targets focused on clinical care  - Staffing shortages within teams | - Self-rostering and autonomous working  - Woman-centred culture: opportunity to deliver relational care, health education and build community  - Improvements in technology since Covid-19  - Tying in with existing performance indicators  - Rolling training programme to address churn and broaden awareness of the model.  - Potential to attract staff / no need for additional staff |
| **Individual domain** (considers how the roles and characteristics of individuals who were involved in implementing, delivering, and receiving an innovation affected implementation) | **Leaders**:  - Changes in management - Team leaders dealing with staff shortages  - Limited communication with the wider maternity team  **Midwives:**  - Anxiety about change  - Lack of management support, continuity and time for planning  **Participants:**  - Anxiety about being part of a group and being able to raise personal issues  - Lack of familiarity with group model  - Burden of appointments for women with complex needs  - Lack of interpreters or childcare | **Leaders**:  - Buy-in by middle- and upper-management  - Co-design with front-line midwives  - Champions at all levels of the service  **Midwives:**  - Training and ongoing support  - Continuity: building skills and relationships  - Support/value of working alongside a colleague  - Job satisfaction: practising ‘real midwifery’  **Participants:**  **-** Opportunity to meet other people and build community  - Lack of time and continuity in traditional care  - More opportunities for learning  - Mixed groups sharing ideas and problems  - Potential for more disclosure/discussion  - Increased postnatal support |
