# Supplementary material for: What influences the implementation of group antenatal care in English NHS maternity settings? Findings from a qualitative process evaluation integrated within a randomised controlled trial of Pregnancy Circles
Source: Research Square preprint supplement (doi:10.21203/rs.3.rs-6396617/v1), 2025-04-23
Supplement: Supplementary file 1 [file 23e90ff8cfe00703d1eacc80.pdf]

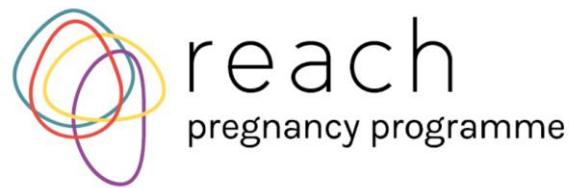

## **Evaluation of the Pregnancy Circles OBSERVATION GUIDE**

### **AIMS:**

1. To provide a 'thick description' of this aspect of the development of the group model of care
2. To develop understanding of how women and (where relevant) their partners/support persons respond to and participate in the group sessions
3. To develop understanding of staff confidence and preparedness to run groups in order
4. To inform any amendments needed for training and support for staff and information for service users, for the next phase of the implementation

### **Key questions to frame the note taking:**

Non-participant observation.

Note – these are already to some extent analytical, so important to have these in mind, but try as much as possible just to note down **what you see and hear**, not your views or opinions or reactions during the sessions, or your ideas about why you see or hear things – this comes later in the analysis and is covered in 4.

The aim is to be semi-structured: open note taking, but with particular aims and questions in mind.

No names/patient-identifiable data to be noted down.

1. Record a basic but reasonably detailed description of how the group session is structured and delivered
2. How do participants appear to respond to the group model?

How active are participants in contributing?  
Do they respond to midwives' or other participants' or questions?  
Do they come up with their own questions, ideas, answers?  
How do the women cope with the testing? Do they appear to enjoy it?  
How do they respond to the length of the session?  
To what extent do partners/support persons get involved?  
Were there any language issues? How were they dealt with?

## **Pregnancy Circles Observation Guide - Cont/...**

Is everyone involved at some point in the discussion?

- informal chit-chat amongst participants
- facial expressions
- body language
- activity

### **3. Any concerns?**

Do they raise concerns they have?

If so, what kind of concerns?

Do they respond more positively to some activities rather than others?

Do you notice any change in response from beginning to end of the session? (particularly for first session)

At the end or afterwards:

### **4. Your own reactions as an observer**

What is most noticeable to you?

Anything surprise you?

Did you observe what you expected?
