# Supplementary material for: What influences the implementation of group antenatal care in English NHS maternity settings? Findings from a qualitative process evaluation integrated within a randomised controlled trial of Pregnancy Circles
Source: Research Square preprint supplement (doi:10.21203/rs.3.rs-6396617/v1), 2025-04-23
Supplement: Supplementary file 2 [file 2dbcea975f5535ffc45842e5.pdf]

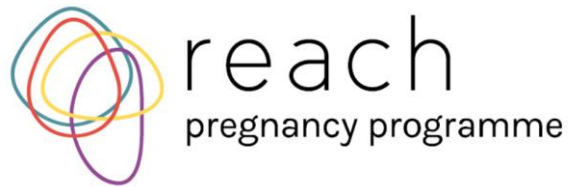

## Evaluation of the Pregnancy Circles:

### TOPIC GUIDE FOR INTERVIEWS

Written consent taken for interview to be audio taped. Confidentiality to be discussed, in particular, assurance given that any criticism of the service will not affect the woman's on-going care and will only be fed back to the service providers as part of an anonymised report. Partners/support persons and baby/children welcome to be present.

### POSTNATAL 1-1 INTERVIEW WITH WOMEN

Please tell me a bit about your birth.

How do you feel about the antenatal care you received now that your baby has been born?

*PROMPT: Did you feel well prepared for your birth and the postnatal period?*

What are your thoughts and feelings about having been part of Pregnancy Circles?

*PROMPT: satisfaction with group model and how it was conducted, contents, convenience, would you do it again or recommend it to another person?*

What were the best things about Pregnancy Circles?

Are there any improvements you would suggest?

Did you meet postnatally? Can you tell me a little about that?

Do you think you will stay in touch with anybody from your Pregnancy Circle?

*PROMPT: How could the facilitators help this to happen?*

Do you think the type of antenatal care you received had an effect on your labour and birth?

*PROMPT: If yes prompt for type of effects and reasons e.g. feeling more in control*

Do you think the type of antenatal care you received had an effect on your health and/or use of health services in the first few months after the birth?

*PROMPT: If yes prompt for type of effects and reasons*

Do you think the type of antenatal care you received had an effect on your baby's and/or your use of health services for your baby in the first few months after the birth?

*PROMPT: If yes prompt for type of effects and reasons*
