# Supplementary material for: What influences the implementation of group antenatal care in English NHS maternity settings? Findings from a qualitative process evaluation integrated within a randomised controlled trial of Pregnancy Circles
Source: Research Square preprint supplement (doi:10.21203/rs.3.rs-6396617/v1), 2025-04-23
Supplement: Supplementary file 3 [file 7723970902134e4f99cdec5c.pdf]

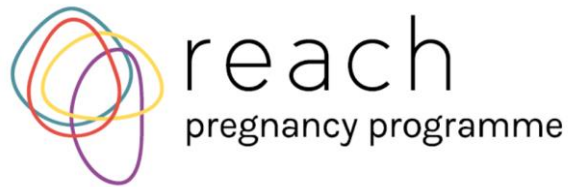

## **Evaluation of the Pregnancy Circles: TOPIC GUIDE FOR INTERVIEWS WITH FACILITATING MIDWIVES**

**Written consent taken for interview to be audio taped. Confidentiality to be discussed, in particular, assurance given that any criticism of the service will not affect the woman's on-going care and will only be fed back to the service providers as part of an anonymised report.**

### **WIDWIVES WHO FACILITATE PREGNANCY CIRCLES**

#### **Midwives' views**

Strengths and weaknesses of providing care in a Pregnancy Circle.

How far do you feel the pregnancy circles help to improve women's experiences of antenatal care?

Thoughts and feelings about having conducted a group ANC (knowledge to conduct group ANC; confidence to conduct the group; satisfaction with the results at the end of women's pregnancy)

Specific aspects of facilitation that they found most challenging

How would you do things differently if you were to do it again?

How do you feel about the composition of the groups – e.g. diversity in language, culture, experience.

How did you feel about the observations by the research team?

What do you feel about the demands made on the women for the research e.g. questionnaires, interviews, randomisation?

Support needed (for women and midwives) to make the groups work

Group postnatal care (do you think it would be important to follow women up to postnatal period? Number of sessions and beginning when; Extension during postnatal period; A midwife or another health professional)
